# Supplementary material
Source: PubMed Central journal article supplement (PMC2703536)
Supplement: en.2008-1630_3.pdf [file en.2008-1630_3.pdf]

**Supplementary Table 3.** DNA replication licensing and cell cycle-associated genes regulated by 6h progesterone in normal breast and T-47D breast cancer cells in matrix-embedded culture.

| Symbol                                  | Accession      | Name                                             | Normal breast |          | T-47D      |          |
|-----------------------------------------|----------------|--------------------------------------------------|---------------|----------|------------|----------|
|                                         |                |                                                  | Mean Fold*    | p value# | Mean Fold+ | p value# |
| DNA replication licencing               |                |                                                  |               |          |            |          |
| CDC7                                    | NM_003503.2    | Cell division cycle 7                            | 1.5           | 0.0020   | nr         | nr       |
| CDT1                                    | NM_030928.2    | Chromatin licensing and DNA replication factor 1 | 1.7           | 0.0013   | nr         | nr       |
| MCM2                                    | NM_004526.2    | Minichromosome maintenance deficient 2           | 2.2           | 0.0005   | nr         | nr       |
| MCM3                                    | NM_002388.3    | Minichromosome maintenance deficient 3           | 1.8           | 0.0006   | nr         | nr       |
| MCM4                                    | NM_005914.2    | Minichromosome maintenance deficient 4           | 1.9           | 0.0001   | nr         | nr       |
| MCM5                                    | NM_006739.3    | Minichromosome maintenance deficient 5           | 2.0           | 0.0004   | nr         | nr       |
| ORC1L                                   | NM_004153.2    | Origin recognition complex, subunit 1-like       | 1.7           | 0.0019   | nr         | nr       |
| ORC5L                                   | NM_002553.2    | Origin recognition complex, subunit 5-like       | 1.4           | 0.0053   | nr         | nr       |
| POLA2                                   | NM_002689.2    | DNA polymerase alpha 2                           | 1.7           | 0.0006   | nr         | nr       |
| G1/S transition                         |                |                                                  |               |          |            |          |
| CCNB2                                   | NM_004701.2    | Cyclin B2                                        | -1.7          | 0.0028   | nr         | nr       |
| CCND1                                   | NM_053056.2    | Cyclin D1                                        | 1.5           | 0.0029   | nr         | nr       |
| CCND2                                   | NM_001759.2    | Cyclin D2                                        | 1.5           | 0.0008   | nr         | nr       |
| CCNE2                                   | NM_057749.1    | Cyclin E2                                        | 1.96          | 0.0008   | nr         | nr       |
| CCNG1                                   | NM_199246.1    | Cyclin G1, transcript variant 2                  | -1.66         | 0.0000   | -2.0       | 0.0000   |
| CDC25A                                  | NM_001789.2    | Cell division cycle 25A, transcript variant 1    | 2.4           | 0.0001   | nr         | nr       |
| CDK6                                    | NM_001259.5    | Cyclin-dependent kinase 6                        | 1.5           | 0.0007   | 2.1        | 0.0000   |
| CDKN3                                   | NM_005192.2    | Cyclin-dependent kinase inhibitor 3              | -1.7          | 0.0020   | nr         | nr       |
| CLK1                                    | NM_004071.2    | CDC-like kinase 1                                | 1.4           | 0.0000   | nr         | nr       |
| DUSP1                                   | NM_004417.2    | Dual specificity phosphatase 1                   | -1.2          | 0.0025   | nr         | nr       |
| E2F1                                    | NM_005225.1    | E2F transcription factor 1                       | 2.3           | 0.0025   | nr         | nr       |
| E2F2                                    | NM_004091.2    | E2F transcription factor 2                       | 1.8           | 0.0001   | nr         | nr       |
| E2F3                                    | NM_001949.2    | E2F transcription factor 3                       | 1.4           | 0.0025   | nr         | nr       |
| E2F4                                    | NM_001950.3    | E2F transcription factor 4                       | 1.7           | 0.0017   | nr         | nr       |
| TFDP1                                   | NM_007111.3    | Transcription factor Dp-1                        | 1.6           | 0.0015   | nr         | nr       |
| G2/M check-point & kinetochore function |                |                                                  |               |          |            |          |
| CDC25B                                  | NM_021872.2    | Cell division cycle 25B, transcript variant 3    | -1.6          | 0.0003   | nr         | nr       |
| CDC25C                                  | NM_022809.2    | Cell division cycle 25C, transcript variant 2    | -2.0          | 0.0048   | nr         | nr       |
| LMNB1                                   | NM_005573.2    | Lamin B1                                         | 1.2           | 0.0028   | nr         | nr       |
| LMNB2                                   | NM_032737.2    | Lamin B2                                         | 1.6           | 0.0018   | nr         | nr       |
| RAN                                     | NM_006325.2    | RAN, member RAS oncogene family                  | 1.5           | 0.0019   | nr         | nr       |
| RCC1                                    | NM_001048197.1 | Regulator of chromosome condensation 1           | 1.5           | 0.0007   | nr         | nr       |

nr = not regulated. \* Mean fold change, 6h progesterone vs vehicle in regulated normal breast cultures.

+ Mean fold change, 6h progesterone vs vehicle in T-47D in matrix-embedded culture.

# Differential expression p-value.
